# Supplementary material for: Circulating Inflammatory Cytokines and Risk of Intracranial Aneurysm: A Mendelian-randomization Study
Source: bioRxiv or medRxiv preprint supplement (doi:10.1101/2023.12.17.23300093), 2023-12-18

## Supplementary Figures

**Supplementary Figure S1.** Causalities of aSAH on cytokines. Beta and 95% CI indicate the alteration in the standard deviation of cytokines per log odds rise in aSAH. Significance was determined using a p-value threshold of  $0.05 / 41 = 0.0012$  following Bonferroni correction. The inverse variance weighted method was applied consistently across all groups except for IL-13, IL-1ra, and TNFa, which applied the IVW (multiplicative random effects) method.

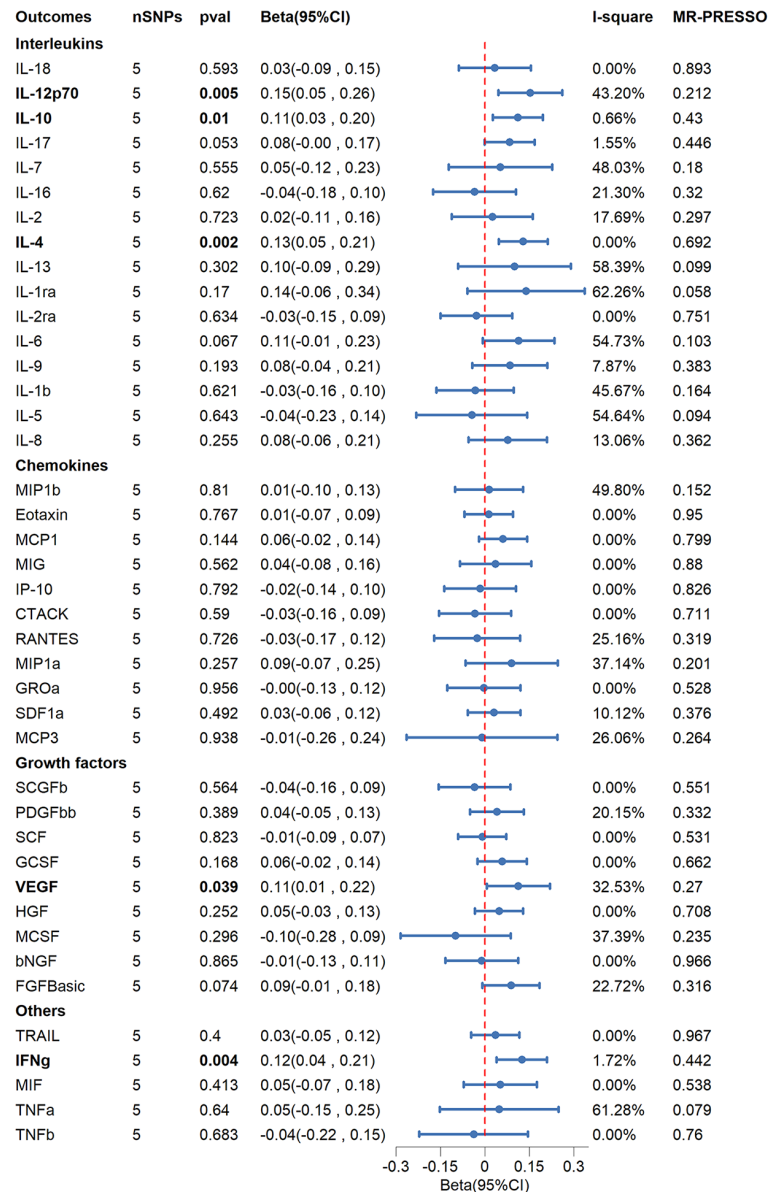

**Supplementary Figure S2.** Forest plot and leave-one-out sensitivity analyses of MR analysis between inflammatory cytokines and UIA.

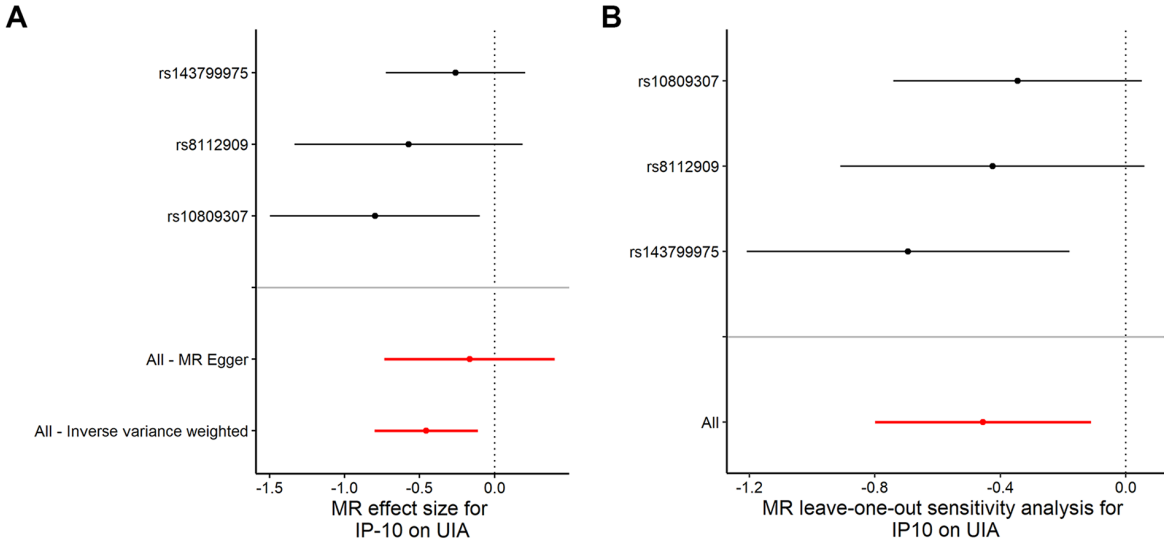

**Supplementary Figure S3.** Forest plots of MR analysis between inflammatory cytokines and aSAH. (A-D): IL-10, VEGF, FGFBasic, and TRAIL.

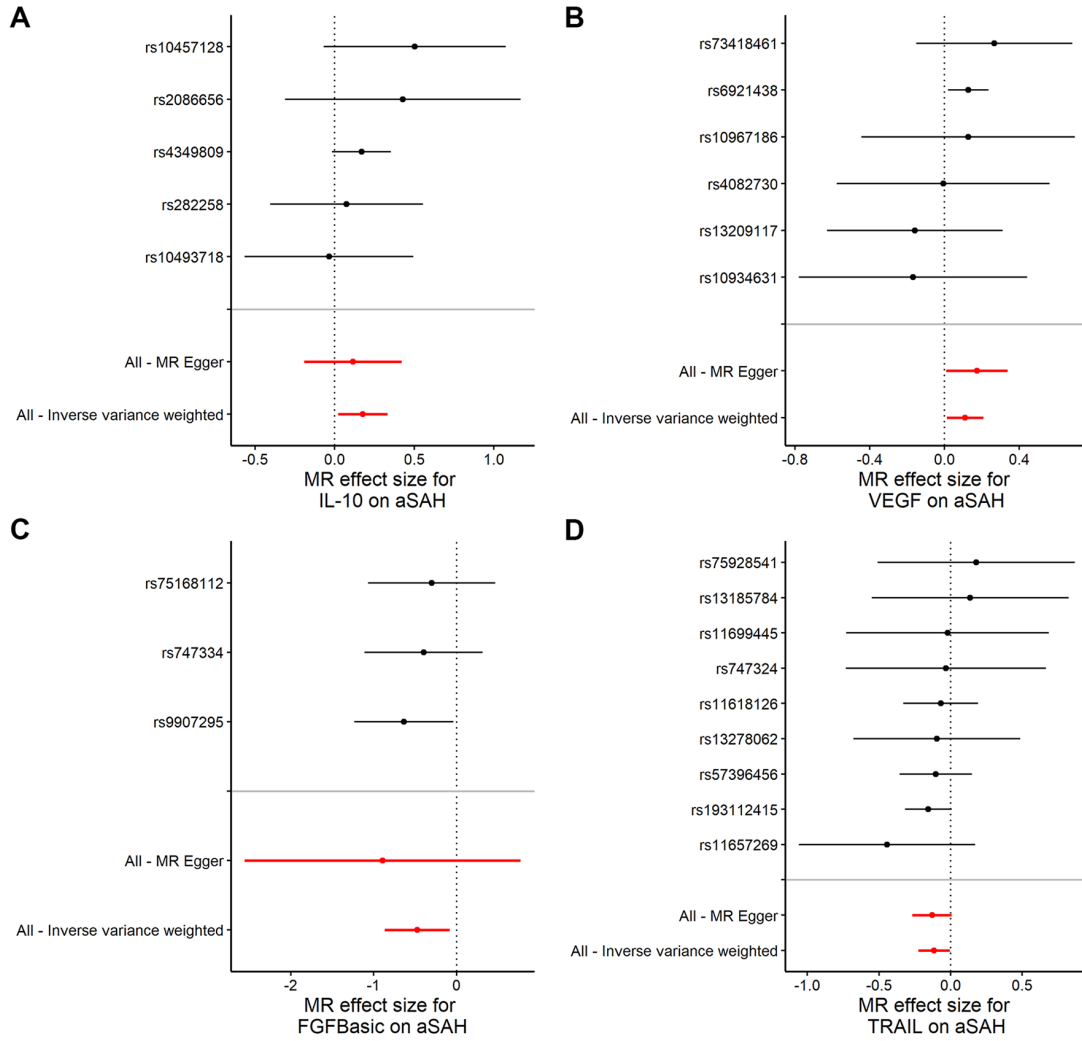

**Supplementary Figure S4.** Leave-one-out sensitivity analyses of MR analysis between inflammatory cytokines and aSAH. (A-D): IL-10, VEGF, FGFBasic, and TRAIL.

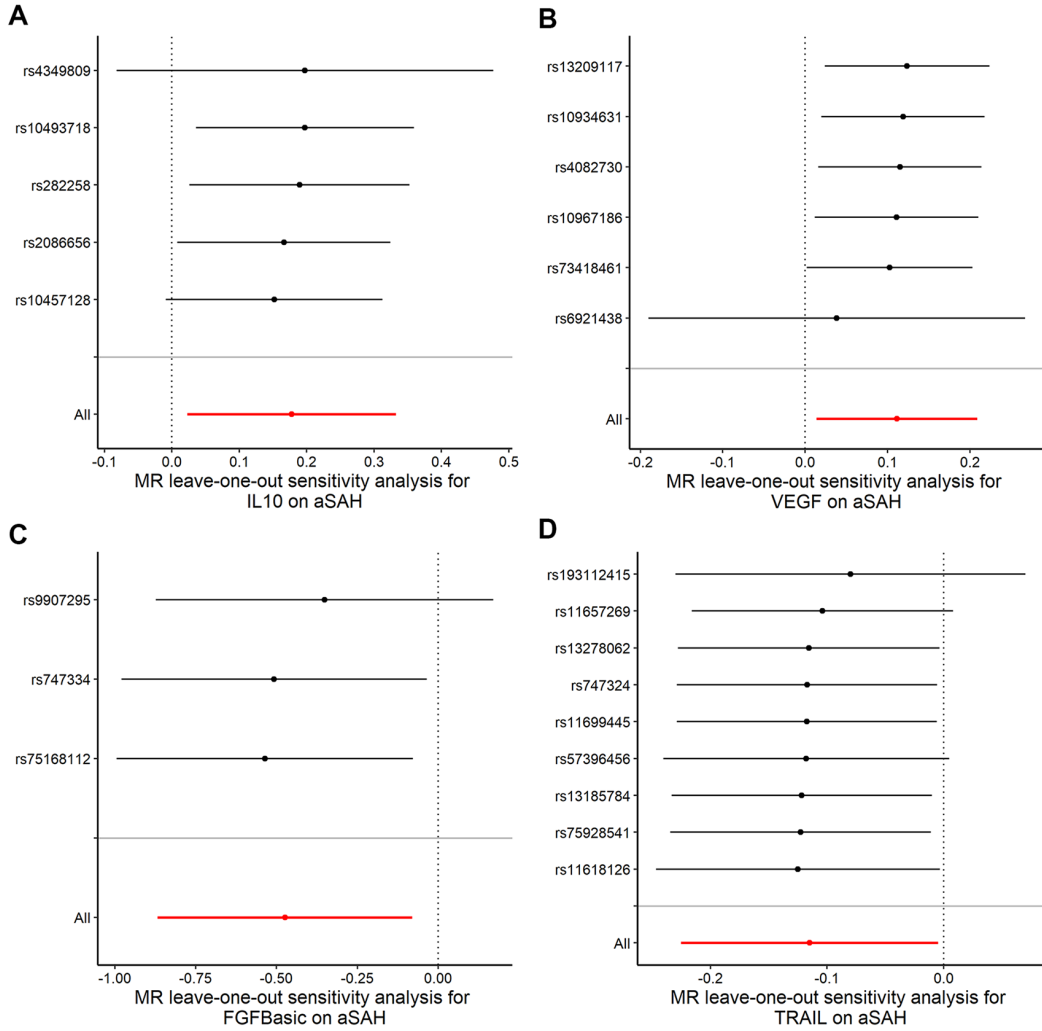

**Supplementary Figure S5.** Forest plots of MR analysis between IA and inflammatory cytokines. (A-J): IL-12p70, IL-4, IFN $\gamma$ , IL-10, IL-17, IL-1ra, IL-6, IL-9, VEGF, and FGFBasic.

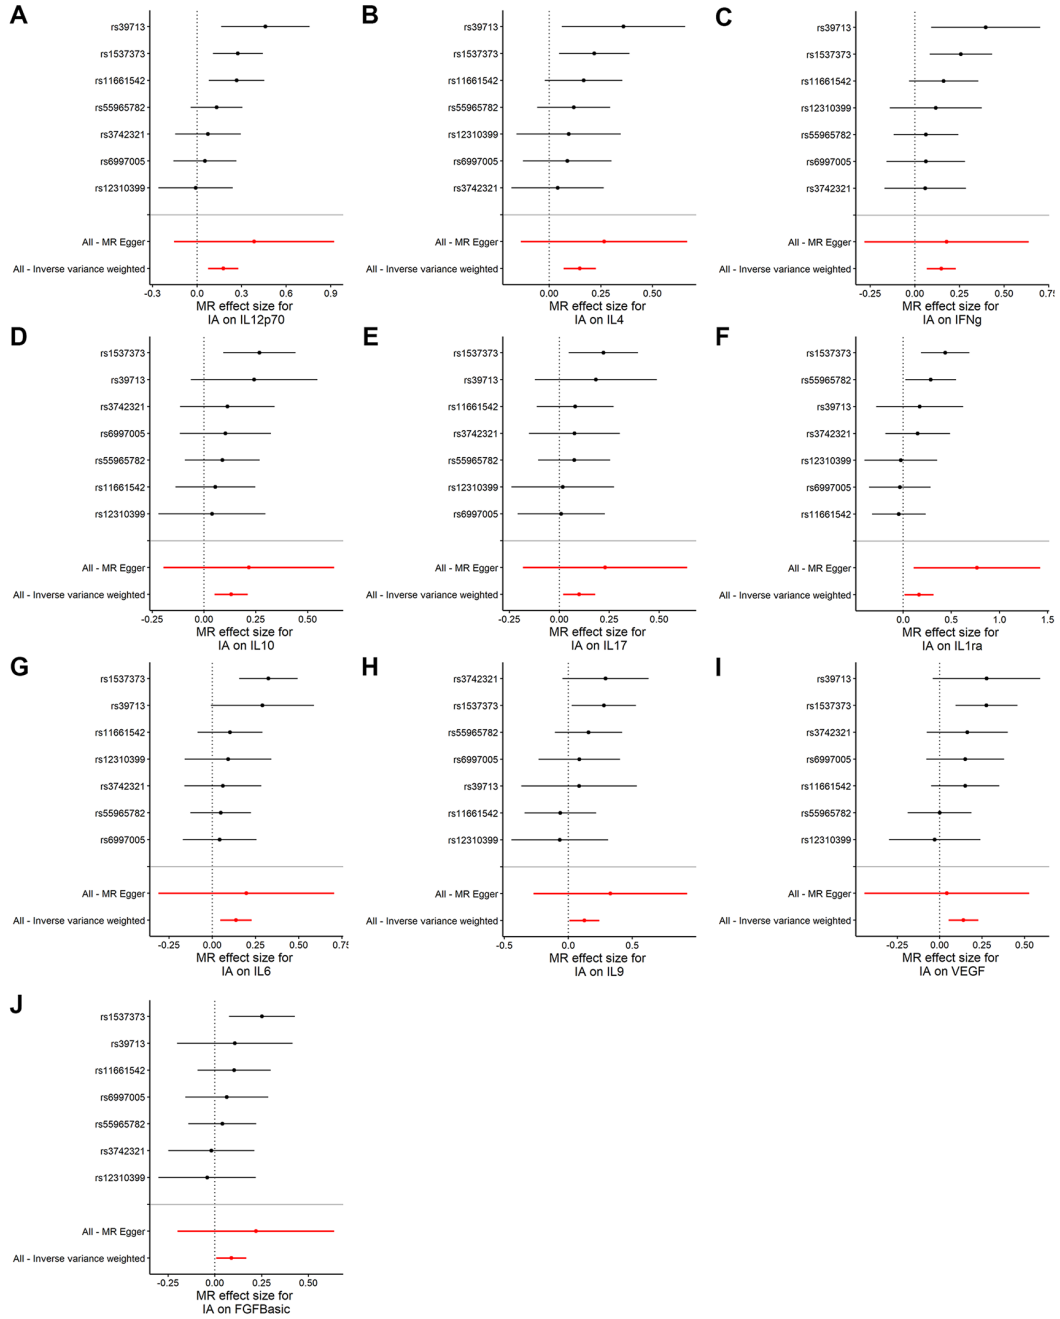

**Supplementary Figure S6.** Leave-one-out sensitivity analyses of MR analyses between IA and inflammatory cytokines. (A-J): IL-12p70, IL-4, IFN $\gamma$ , IL-10, IL-17, IL-1ra, IL-6, IL-9, VEGF, and FGFBasic.

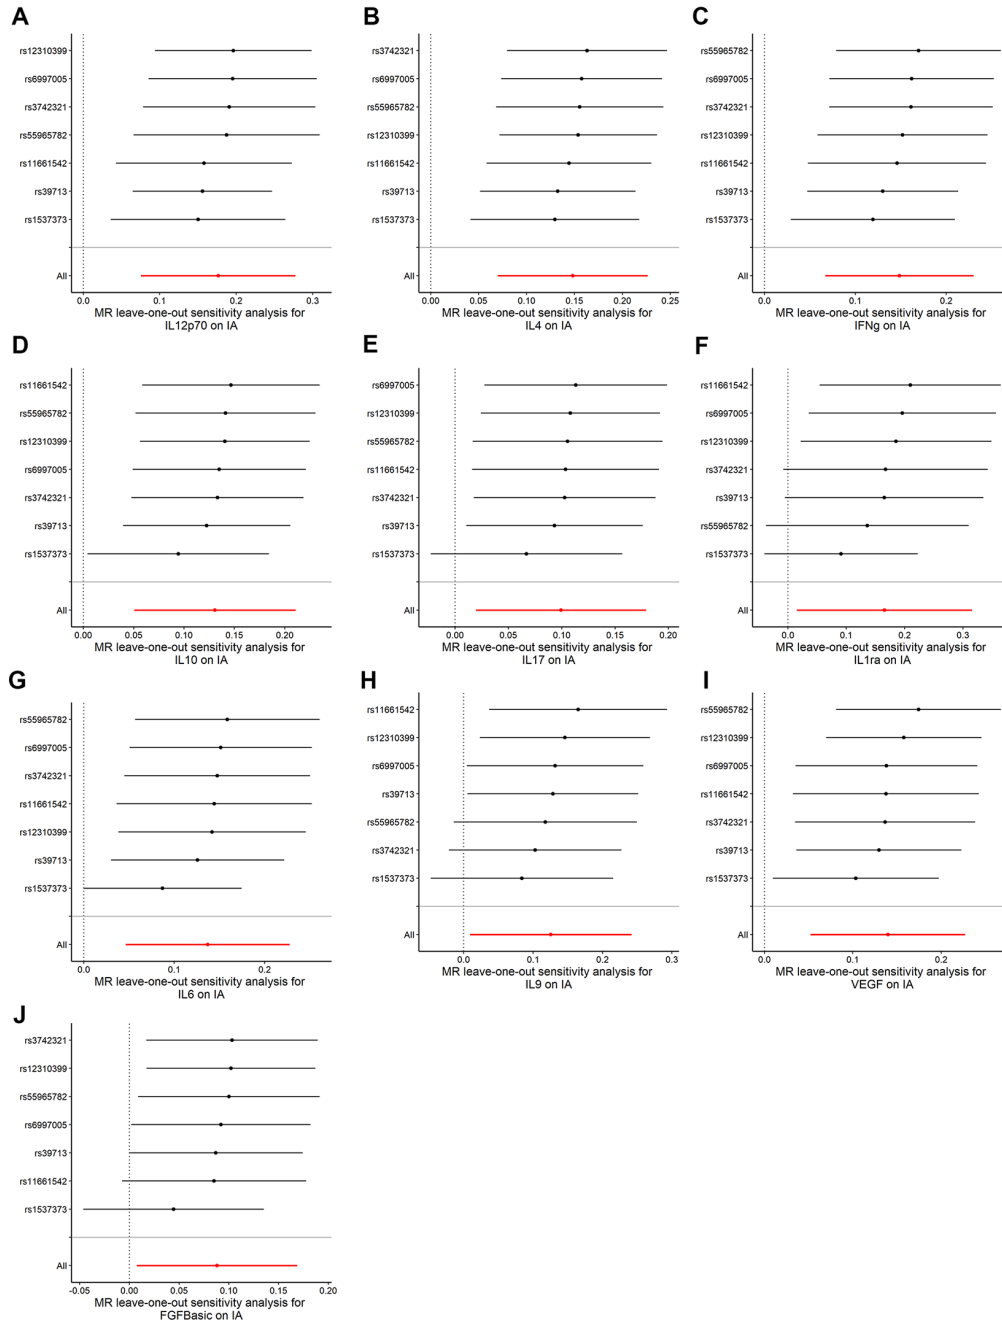

Supplement: Supplementary file [file media-1.pdf]
